# Supplementary material for: Well-being and PTSD in German emergency medical services – A nationwide cross-sectional survey
Source: PubMed Central journal article supplement (PMC6650072; doi:10.1371/journal.pone.0220154), 2019-07-23
Supplement: pone.0220154.s002.pdf [file pone.0220154.s002.pdf]

1. Please tell us your age in whole years

2. Please tell us your gender

- male
- female

3. Please tell us your height and weight

- height in cm
- body weight in kg

4. Your highest level of professional training:

- Notfallsanitäter
- Notfallsanitäter in Ausbildung
- Rettungsassistent
- RAiP
- Rettungssanitäter
- other qualification
- nurse
- emergency physician

5. How long have you been working in EMS? (In whole years)

If you have been working shorter than a year, please enter „0“

- years of service

6. How many emergency missions have you handled in your career?

An estimate number is sufficient!

- Number of emergency missions

7. WHO (Five) Well-Being Index

Please indicate for each of the five statements which is closest to how you have been feeling over the last two weeks.

| Over the last two weeks...                                 | All of the time | Most of the time | More than half of the time | Less than half of the time | Some of the time | At no time |
|------------------------------------------------------------|-----------------|------------------|----------------------------|----------------------------|------------------|------------|
| I have felt cheerful and in good spirits                   |                 |                  |                            |                            |                  |            |
| I have felt calm and relaxed                               |                 |                  |                            |                            |                  |            |
| I have felt active and vigorous                            |                 |                  |                            |                            |                  |            |
| I woke up feeling fresh and rested                         |                 |                  |                            |                            |                  |            |
| My daily life has been filled with things that interest me |                 |                  |                            |                            |                  |            |

8. Did you ever handle mentally distressing or traumatic emergency missions?

- Number of mentally distressing missions in your entire career
- Number of mentally distressing missions in the last 12 months

9. During your most traumatic incident...

- ... did you feel helpless? (yes/no)
- ... have you been very afraid or horrified? (yes/no)

10. Short Screening Scale for DSM-IV Post-traumatic Stress Disorder

| In the past month...                                                                                        | At no time | Once per week or less | 2-4 times a week | 5-times a week / all of the time |
|-------------------------------------------------------------------------------------------------------------|------------|-----------------------|------------------|----------------------------------|
| Did you avoid being reminded of this experience by staying away from certain places, people, or activities? |            |                       |                  |                                  |
| Did you lose interest in activities that were once important or enjoyable?                                  |            |                       |                  |                                  |
| Did you begin to feel more isolated or distant from other people?                                           |            |                       |                  |                                  |
| Did you find it hard to have love or affection for other people?                                            |            |                       |                  |                                  |
| Did you begin to feel that there was no point in planning for the future?                                   |            |                       |                  |                                  |
| After this experience were you having more trouble than usual falling asleep or staying asleep?             |            |                       |                  |                                  |
| Did you become jumpy or get easily startled by ordinary noises or movements?                                |            |                       |                  |                                  |
